# Supplementary figures and images for: A 2-Year Follow-Up After a 2-Year RCT with Vitamin D and Exercise: Effects on Falls, Injurious Falls and Physical Functioning Among Older Women
Source: PubMed Central journal article supplement — J Gerontol A Biol Sci Med Sci. 2017 Mar 21;72(9):1239–45. doi: 10.1093/gerona/glx044 (PMC5861967; doi:10.1093/gerona/glx044), 2017-03-21

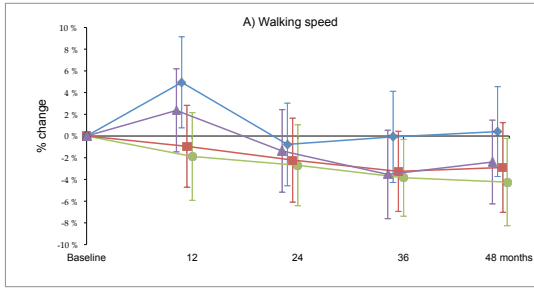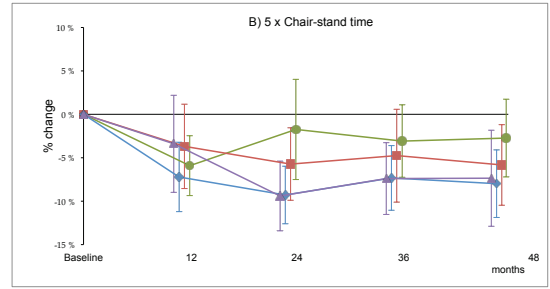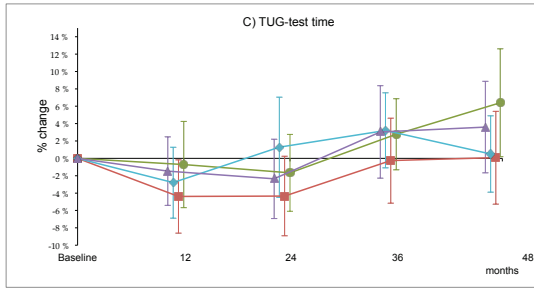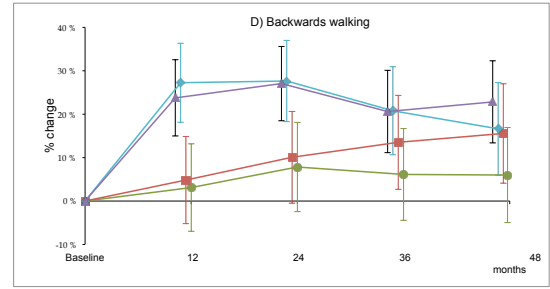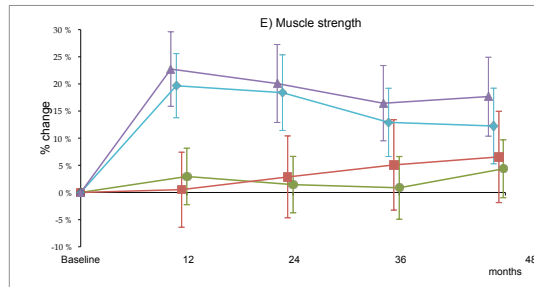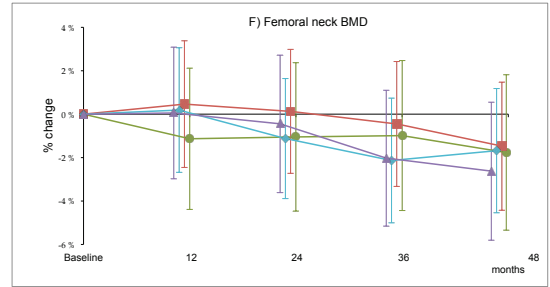

— D-Exr — D+E-xr — D-Exr — D+E-xr

Supplement: glx044_suppl_uusi-rasi_suppl_fig_3.pdf [file glx044_suppl_uusi-rasi_suppl_fig_3.pdf]
